# Supplementary material
Source: publisher figshare collection journal article supplement (https://f1000.figshare.com/articles/dataset/_/762434)
Supplement: Supplementary file 1 [file 1]

**CKD Database for all Negev CKD children (age < 19 yrs): 1/1994- 12/2008**

**Soroka University Medical Center**

**PI: Daniel Landau, MD**

Study # \_\_\_\_\_ Family Name: \_\_\_\_\_ First Name: \_\_\_\_\_  
ID#: \_\_\_\_\_ DOB (mm/yyyy): \_\_\_\_\_  
M/F: \_\_\_\_\_ B/J: \_\_\_\_\_ City: \_\_\_\_\_  
Current CKD Stage (1-5): \_\_\_\_\_  
Hypodysplasia/GRD/GN/Obstr-Uropath/Other: \_\_\_\_\_  
Family Hx of CKD (y/n): \_\_\_\_\_  
Renal Dx for CKD: \_\_\_\_\_  
If OU: Neurogenic Bladder or Congenital Uropathy?: \_\_\_\_\_  
Non renal Dx 2: \_\_\_\_\_  
Non renal Dx 3: \_\_\_\_\_  
Non renal Dx 4: \_\_\_\_\_  
Biopsy for Dx confirmation (y/n): \_\_\_\_\_  
Age of Dx of CKD (yrs): \_\_\_\_\_  
Exitus (y/n): \_\_\_\_\_  
Negev + CKD+Alive+Age < 19@ 12/08 (y/n): \_\_\_\_\_  
HTN (y/n): \_\_\_\_\_  
Acidosis (HCO<sub>3</sub> Rx) (y/n): \_\_\_\_\_  
EPO Rx (y/n): \_\_\_\_\_  
Urologic surgery (y/n): \_\_\_\_\_  
Transplanted (y/n): \_\_\_\_\_  
Dialysis (y/n): \_\_\_\_\_  
If yes PD=1; Hemo= 2 ; PD & hemo= 3: \_\_\_\_\_  
U-Prot/Creat (mg/ mg) > 0.2 (y/n): \_\_\_\_\_  
U-(alb/Cr) (mg/g) > 30 (y/n): \_\_\_\_\_
